# Supplementary material for: “Keep it simple, scholar”: an experimental analysis of few-parameter segmentation networks for retinal vessels in fundus imaging
Source: Springer Nature journal article supplement (doi:10.1007/s11548-021-02340-1), 2021-04-30
Supplement: MOESM1 [file 19123684]

# Supplementary: “Keep it Simple, Scholar”: An Experimental Analysis of Few-Parameter Segmentation Networks for Retinal Vessels in Fundus Imaging

Weilin Fu, Katharina Breininger, Roman Schaffert, Zhaoya Pan, and Andreas Maier

## I. PARAMETER SEARCHING

The parameter searching experiment is carried out on the HRF [1] database, since it contains 45 images and is the largest public annotated fundus database. Nine hyperparameters are taken into consideration. The size of training image patches are selected from the pool of  $304^2, 400^2, 496^2, 592^2, 704^2$ . The size of the filter in each convolution operation is chosen from  $3^2, 5^2, 7^2$ . The size of the training batch ranges from 5 to 30. The optimizer is selected from the Adam optimizer [2], the SGD with momentum optimizer and the gradient descent optimizer. The learning rate is chosen from the the pool of  $10^{-2}, 10^{-3}, 10^{-4}, 10^{-5}, 10^{-6}$ . After 5000, 10000, 15000 or 20000 steps, the learning rate decays with a decaying rate ranging from 0.8 to 0.95. If the SGD with momentum optimizer is chosen, the momentum is a value that ranges between 0.6 and 0.9. The regularizer for the weights in the models ranges between 0.01 and 0.25. The training process goes on for 30000 iterations. The convergence speeds of the loss curves and absolute values of the F1 score curves of the validation sets are used as the indices to determine the quality of the training process, and the validation images are binarized with the threshold of 0.5. 29 experiment roll-outs with randomly selected hyperparameter combinations are conducted. The hyperparameters together with our observations are presented in Table I. The selected configuration is highlighted in red.

TABLE I  
THE RANDOMLY SELECTED PARAMETER COMBINATIONS FOR THE 29 EXPERIMENT ROLL-OUTS.

|               | exp01      | exp02      | exp03      | exp04      | exp05      | exp06      | exp07      | exp08      | exp09      | exp10      |
|---------------|------------|------------|------------|------------|------------|------------|------------|------------|------------|------------|
| patch size    | [704, 704] | [304, 304] | [496, 496] | [304, 304] | [496, 496] | [704, 704] | [592, 592] | [592, 592] | [496, 496] | [704, 704] |
| filter size   | [7, 7]     | [5, 5]     | [3, 3]     | [7, 7]     | [3, 3]     | [5, 5]     | [3, 3]     | [5, 5]     | [7, 7]     | [3, 3]     |
| batch size    | 11         | 26         | 23         | 29         | 21         | 28         | 15         | 5          | 13         | 15         |
| optimizer     | momen      | momen      | gradi      | gradi      | momen      | gradi      | gradi      | gradi      | momen      | momen      |
| learning rate | 0.001      | 1e-05      | 0.0001     | 0.001      | 1e-06      | 0.0001     | 0.001      | 0.001      | 0.001      | 0.001      |
| momentum      | 0.7583     | 0.7267     | -          | -          | 0.6893     | -          | -          | -          | 0.8975     | 0.7646     |
| decay rate    | 0.9055     | 0.8809     | 0.8422     | 0.8516     | 0.8443     | 0.8908     | 0.9382     | 0.8159     | 0.9200     | 0.8361     |
| decay step    | 5000       | 20000      | 5000       | 5000       | 20000      | 15000      | 10000      | 5000       | 10000      | 20000      |
| regularizer   | 0.1846     | 0.2056     | 0.1961     | 0.1034     | 0.1726     | 0.0716     | 0.0146     | 0.1276     | 0.2122     | 0.0200     |
| convergence   | slow       | super slow | very slow  | super slow | super slow |            | slow       | very slow  | fast       | alright    |
| F1 after 30k  | 0.75       | 0.13       | 0.18       | 0.14       | 0.15       |            | 0.66       | 0.35       | 0.78       | 0.58       |
|               | exp11      | exp12      | exp13      | exp14      | exp15      | exp16      | exp17      | exp18      | exp19      | exp20      |
| patch size    | [304, 304] | [496, 496] | [400, 400] | [496, 496] | [592, 592] | [704, 704] | [496, 496] | [704, 704] | [400, 400] | [304, 304] |
| filter size   | [5, 5]     | [7, 7]     | [7, 7]     | [3, 3]     | [7, 7]     | [5, 5]     | [3, 3]     | [7, 7]     | [5, 5]     | [3, 3]     |
| batch size    | 13         | 11         | 19         | 26         | 27         | 10         | 7          | 20         | 20         | 11         |
| optimizer     | gradi      | Adam       | Adam       | momen      | gradi      | gradi      | momen      | gradi      | Adam       | gradi      |
| learning rate | 0.0001     | 0.001      | 0.01       | 0.01       | 0.01       | 0.0001     | 0.001      | 0.001      | 0.01       | 0.001      |
| momentum      | 0.6967     | 0.7432     | 0.8643     | 0.6022     | 0.7000     | -          | 0.7106     | -          | -          | -          |
| decay rate    | -          | -          | -          | 0.9318     | -          | 0.8148     | 0.8269     | 0.9486     | 0.8853     | 0.802      |
| decay step    | 5000       | 10000      | 15000      | 20000      | 5000       | 15000      | 10000      | 5000       | 5000       | 15000      |
| regularizer   | 0.0751     | 0.0436     | 0.0299     | 0.1310     | 0.0935     | 0.2046     | 0.1166     | 0.0620     | 0.1843     | 0.2412     |
| convergence   | super slow | very fast  | very fast  | fast       | fast       | super slow |            |            | very fast  | slow       |
| F1 after 30k  | 0.11       | 0.74       | 0.4-0.6    | 0.83       | 0.74       | 0.133      | 0.617      |            | 0.6        | 0.43       |
|               | exp21      | exp22      | exp23      | exp24      | exp25      | exp26      | exp27      | exp28      | exp29      |            |
| patch size    | [592, 592] | [496, 496] | [704, 704] | [304, 304] | [704, 704] | [704, 704] | [496, 496] | [400, 400] | [592, 592] |            |
| filter size   | [5, 5]     | [3, 3]     | [3, 3]     | [7, 7]     | [3, 3]     | [3, 3]     | [3, 3]     | [7, 7]     | [3, 3]     |            |
| batch size    | 6          | 24         | 15         | 19         | 13         | 28         | 23         | 17         | 27         |            |
| optimizer     | momen      | momen      | Adam       | gradi      | gradi      | Adam       | momen      | Adam       | momen      |            |
| learning rate | 0.001      | 0.001      | 0.0001     | 0.01       | 0.0001     | 0.0001     | 0.0001     | 0.0001     | 0.0001     |            |
| momentum      | 0.8786     | 0.7531     | -          | -          | -          | -          | 0.6419     | -          | 0.7288     |            |
| decay rate    | 0.8135     | 0.8674     | 0.9209     | 0.8348     | 0.9196     | 0.8708     | 0.9174     | 0.9092     | 0.811      |            |
| decay step    | 10000      | 10000      | 5000       | 15000      | 20000      | 5000       | 10000      | 5000       | 10000      |            |
| regularizer   | 0.1343     | 0.1503     | 0.0843     | 0.2132     | 0.0301     | 0.8708     | 0.056      | 0.2237     | 0.0167     |            |
| convergence   | fast       | ok         | fast       | very fast  | very slow  | fast       | slow       | fast       | very slow  |            |
| F1 after 30k  | 0.74       | 0.68       | 0.77       | 0.67       | 0.1        | 0.75       | 0.2        | 0.79       | 0.2        |            |

## II. SIGNIFICANCE TEST

The average AUC scores over five repetitive runs for each image in the HRF database on different U-Net variants are presented in Table II. The AUC scores of the predictions from each network configuration, which correspond to different columns of the table, are regarded as samples that are drawn from a distribution. Student t-tests [3] are carried out to judge whether the predictions from the U-Net variants are significantly different from those of the default U-Net configuration. Double tail t-tests assuming unequal variances with the alpha values equal 0.05 are performed. The null hypothesis for the tests is that the means of the distribution from the two distributions are the same. The calculated t-value is compared with the t-table value. When the computed t-value has a larger absolute value than the t-table value at the alpha level, we reject the hypothesis that the two distributions have the same mean value. In other words, the mean of the two distributions are significantly different. From Table III, it is observed that the U-Net with structural modifications, fine-tuned hyperparameters or additional scale levels are not significantly better than the default U-Net model as for segmentation performance.

TABLE II  
THE AVERAGE AUC SCORES OVER FIVE REPETITIVE RUNS FOR EACH IMAGE ON DIFFERENT U-NET VARIANTS.

| test_file | default U | residual | dense  | dilate | side   | conv1  | linear | no skip | par    | 5-level |
|-----------|-----------|----------|--------|--------|--------|--------|--------|---------|--------|---------|
| 11_g      | 0.9831    | 0.9835   | 0.9824 | 0.9817 | 0.9831 | 0.9798 | 0.9696 | 0.9821  | 0.9829 | 0.9832  |
| 15_d      | 0.9782    | 0.9780   | 0.9780 | 0.9776 | 0.9782 | 0.9727 | 0.9574 | 0.9780  | 0.9775 | 0.9789  |
| 12_h      | 0.9873    | 0.9870   | 0.9874 | 0.9873 | 0.9872 | 0.9855 | 0.9797 | 0.9863  | 0.9873 | 0.9869  |
| 13_g      | 0.9786    | 0.9789   | 0.9781 | 0.9784 | 0.9789 | 0.9741 | 0.9619 | 0.9780  | 0.9791 | 0.9792  |
| 14_g      | 0.9769    | 0.9770   | 0.9764 | 0.9763 | 0.9769 | 0.9713 | 0.9585 | 0.9760  | 0.9774 | 0.9771  |
| 7_h       | 0.9894    | 0.9894   | 0.9887 | 0.9888 | 0.9892 | 0.9869 | 0.9789 | 0.9882  | 0.9891 | 0.9893  |
| 14_h      | 0.9878    | 0.9880   | 0.9880 | 0.9878 | 0.9877 | 0.9855 | 0.9761 | 0.9868  | 0.9880 | 0.9875  |
| 14_d      | 0.9756    | 0.9755   | 0.9747 | 0.9730 | 0.9754 | 0.9707 | 0.9558 | 0.9745  | 0.9755 | 0.9763  |
| 7_g       | 0.9844    | 0.9844   | 0.9834 | 0.9823 | 0.9846 | 0.9811 | 0.9712 | 0.9833  | 0.9841 | 0.9844  |
| 15_g      | 0.9790    | 0.9793   | 0.9782 | 0.9773 | 0.9793 | 0.9750 | 0.9622 | 0.9783  | 0.9789 | 0.9792  |
| 5_h       | 0.9890    | 0.9888   | 0.9882 | 0.9867 | 0.9887 | 0.9861 | 0.9785 | 0.9876  | 0.9886 | 0.9887  |
| 6_g       | 0.9851    | 0.9846   | 0.9852 | 0.9852 | 0.9846 | 0.9810 | 0.9687 | 0.9846  | 0.9857 | 0.9863  |
| 1_h       | 0.9810    | 0.9813   | 0.9816 | 0.9812 | 0.9816 | 0.9791 | 0.9603 | 0.9797  | 0.9818 | 0.9831  |
| 3_h       | 0.9805    | 0.9807   | 0.9812 | 0.9812 | 0.9806 | 0.9772 | 0.9556 | 0.9795  | 0.9812 | 0.9828  |
| 4_d       | 0.9800    | 0.9795   | 0.9807 | 0.9811 | 0.9805 | 0.9740 | 0.9597 | 0.9791  | 0.9807 | 0.9829  |
| 2_g       | 0.9826    | 0.9828   | 0.9828 | 0.9824 | 0.9827 | 0.9796 | 0.9673 | 0.9820  | 0.9830 | 0.9839  |
| 10_d      | 0.9788    | 0.9791   | 0.9794 | 0.9786 | 0.9791 | 0.9758 | 0.9603 | 0.9783  | 0.9794 | 0.9803  |
| 11_d      | 0.9822    | 0.9822   | 0.9825 | 0.9818 | 0.9823 | 0.9795 | 0.9643 | 0.9813  | 0.9825 | 0.9835  |
| 7_d       | 0.9809    | 0.9813   | 0.9812 | 0.9813 | 0.9811 | 0.9778 | 0.9640 | 0.9802  | 0.9815 | 0.9828  |
| 2_h       | 0.9866    | 0.9870   | 0.9870 | 0.9883 | 0.9871 | 0.9864 | 0.9782 | 0.9861  | 0.9873 | 0.9884  |
| 1_g       | 0.9783    | 0.9788   | 0.9788 | 0.9787 | 0.9785 | 0.9760 | 0.9625 | 0.9783  | 0.9788 | 0.9798  |
| 1_d       | 0.9712    | 0.9721   | 0.9723 | 0.9742 | 0.9716 | 0.9685 | 0.9531 | 0.9704  | 0.9729 | 0.9752  |
| 10_g      | 0.9829    | 0.9829   | 0.9834 | 0.9826 | 0.9836 | 0.9804 | 0.9665 | 0.9832  | 0.9837 | 0.9840  |
| 5_g       | 0.9854    | 0.9861   | 0.9866 | 0.9857 | 0.9868 | 0.9776 | 0.9686 | 0.9863  | 0.9867 | 0.9874  |
| 9_d       | 0.9680    | 0.9713   | 0.9718 | 0.9702 | 0.9724 | 0.9643 | 0.9325 | 0.9708  | 0.9733 | 0.9730  |
| 13_d      | 0.9800    | 0.9816   | 0.9822 | 0.9815 | 0.9824 | 0.9790 | 0.9604 | 0.9819  | 0.9827 | 0.9830  |
| 12_g      | 0.9808    | 0.9808   | 0.9811 | 0.9805 | 0.9815 | 0.9771 | 0.9641 | 0.9806  | 0.9814 | 0.9818  |
| 6_d       | 0.9585    | 0.9584   | 0.9618 | 0.9583 | 0.9621 | 0.9504 | 0.9252 | 0.9611  | 0.9636 | 0.9643  |
| 13_h      | 0.9858    | 0.9867   | 0.9878 | 0.9876 | 0.9868 | 0.9802 | 0.9712 | 0.9869  | 0.9876 | 0.9879  |
| 12_d      | 0.9736    | 0.9753   | 0.9764 | 0.9753 | 0.9763 | 0.9700 | 0.9500 | 0.9759  | 0.9770 | 0.9776  |
| 10_h      | 0.9834    | 0.9828   | 0.9839 | 0.9828 | 0.9842 | 0.9771 | 0.9603 | 0.9838  | 0.9843 | 0.9848  |
| 8_h       | 0.9873    | 0.9872   | 0.9879 | 0.9875 | 0.9879 | 0.9820 | 0.9710 | 0.9872  | 0.9879 | 0.9886  |
| 4_h       | 0.9861    | 0.9867   | 0.9885 | 0.9882 | 0.9873 | 0.9786 | 0.9650 | 0.9875  | 0.9880 | 0.9888  |
| 9_h       | 0.9827    | 0.9852   | 0.9850 | 0.9849 | 0.9853 | 0.9804 | 0.9655 | 0.9851  | 0.9853 | 0.9863  |
| 5_d       | 0.9815    | 0.9844   | 0.9844 | 0.9840 | 0.9845 | 0.9809 | 0.9696 | 0.9843  | 0.9845 | 0.9851  |
| 15_h      | 0.9885    | 0.9901   | 0.9895 | 0.9896 | 0.9899 | 0.9886 | 0.9780 | 0.9890  | 0.9897 | 0.9898  |
| 11_h      | 0.9868    | 0.9879   | 0.9873 | 0.9880 | 0.9877 | 0.9860 | 0.9770 | 0.9873  | 0.9878 | 0.9879  |
| 9_g       | 0.9796    | 0.9822   | 0.9823 | 0.9816 | 0.9823 | 0.9784 | 0.9657 | 0.9813  | 0.9823 | 0.9828  |
| 8_g       | 0.9819    | 0.9844   | 0.9844 | 0.9842 | 0.9846 | 0.9808 | 0.9705 | 0.9837  | 0.9844 | 0.9851  |
| 6_h       | 0.9869    | 0.9884   | 0.9885 | 0.9880 | 0.9886 | 0.9858 | 0.9754 | 0.9882  | 0.9886 | 0.9892  |
| 2_d       | 0.9758    | 0.9805   | 0.9810 | 0.9803 | 0.9805 | 0.9763 | 0.9583 | 0.9811  | 0.9815 | 0.9816  |
| 3_g       | 0.9805    | 0.9833   | 0.9834 | 0.9809 | 0.9835 | 0.9785 | 0.9637 | 0.9833  | 0.9839 | 0.9840  |
| 4_g       | 0.9798    | 0.9816   | 0.9815 | 0.9806 | 0.9815 | 0.9782 | 0.9649 | 0.9815  | 0.9821 | 0.9822  |
| 8_d       | 0.9734    | 0.9780   | 0.9780 | 0.9773 | 0.9781 | 0.9730 | 0.9600 | 0.9779  | 0.9782 | 0.9790  |
| 3_d       | 0.9772    | 0.9835   | 0.9831 | 0.9830 | 0.9834 | 0.9769 | 0.9593 | 0.9833  | 0.9833 | 0.9849  |

TABLE III  
THE T-VALUE AND T-TABLE REFERENCE VALUE OF EACH U-NET VARIANT WHEN COMPARED WITH THE DEFAULT U-NET CONFIGURATION.  
EXPERIMENTS THAT YIELD SIGNIFICANTLY DIFFERENT PERFORMANCE THAN THE DEFAULT U-NET ARE HIGHLIGHTED IN BOLD FONT.

|         | residual | dense  | dilate | side   | conv1         | linear        | no skip | par    | 5 level |
|---------|----------|--------|--------|--------|---------------|---------------|---------|--------|---------|
| t-value | 0.8332   | 0.9875 | 0.5603 | 1.0735 | <b>2.3211</b> | <b>9.2258</b> | 0.4956  | 1.3065 | 1.8436  |
| t-table | 1.9872   | 1.9876 | 1.9872 | 1.9876 | <b>1.9876</b> | <b>1.9949</b> | 1.9876  | 1.9879 | 1.9879  |

## REFERENCES

- [1] Budai, A., Bock, R., Maier, A., Hornegger, J., Michelson, G.: Robust Vessel Segmentation in Fundus Images. IJBI (2013)
- [2] Kingma, D.P., Ba, J.: Adam: A Method for Stochastic Optimization. arXiv:1412.6980 (2014)
- [3] Student: The probable error of a mean. Biometrika pp. 1–25 (1908)
